# Supplementary material for: Kahn JM, Brazauskas R, Tecca HR, et al. Subsequent neoplasms and late mortality in children undergoing allogeneic transplantation for nonmalignant diseases. Blood Adv. 2020;4(9):2084-2094
Source: PubMed Central journal article supplement — Blood Adv. 2022 Mar 16;6(6):1826. doi: 10.1182/bloodadvances.2021005180 (PMC8941480; doi:10.1182/bloodadvances.2021005180), 2022-03-16
Supplement: advancesADV2021005180-suppl1.pdf [file advancesADV2021005180-suppl1.pdf]

**Supplementary Table 1: Subsequent neoplasms: Individual SN cases with associated primary NMD, conditioning, and cGvHD. Of note: 19 out of the 20 cases of cGVHD were diagnosed prior to SN development. For one patient with both SN and cGVHD, the timing of cGVHD development was not reported.**

| Case number                         | TBI, Yes/No; dose (cGY) | Busulfan, Yes/No; dose (mg) | Conditioning (other) | cGVHD | cGVHD organ                              | SN subtype, (N= 71) | Time to SN (years) | Age at SN |
|-------------------------------------|-------------------------|-----------------------------|----------------------|-------|------------------------------------------|---------------------|--------------------|-----------|
| <b>Severe Aplastic Anemia (SAA)</b> |                         |                             |                      |       |                                          |                     |                    |           |
| 1                                   | Yes, 200                | No                          | cy + flu             | No    |                                          | Genitourinary       | 0.8                | 18        |
| 2                                   | Yes, 200                | No                          | cy                   | No    |                                          | Melanoma*           | 0.0                | 10        |
| 3                                   | No                      | No                          | cy                   | Yes   | Skin, eyes, oral, pulmonary, MSK, GI, GU | Sarcoma*            | 1.2                | 19        |
| 4                                   | Yes, 200                | No                          | cy                   | Yes   | Skin, GI                                 | Non-melanoma skin   | 7.2                | 12        |
| 5                                   | Yes, 1200               | No                          | cy                   | No    |                                          | Sarcoma             | 17.9               | 19        |
| 6                                   | No                      | No                          | cy                   | No    |                                          | Genitourinary*      | 2.8                | 18        |
| 7                                   | No                      | No                          | cy                   | Yes   | Eyes, oral                               | Non-melanoma skin*  | 2.9                | 23        |
| 8                                   | No                      | No                          | cy                   | No    |                                          | Breast              | 0.7                | 18        |
| 9                                   | No                      | No                          | cy                   | No    |                                          | MDS                 | 10.2               | 30        |
| 10                                  | No                      | No                          | cy                   | No    |                                          | Thyroid             | 6.8                | 11        |
| 11                                  | No                      | No                          | cy                   | No    |                                          | AML*                | 1.4                | 5         |
| 12                                  | No                      | No                          | cy                   | No    |                                          | ALL*                | 3.6                | 16        |
| 13                                  | No                      | No                          | cy                   | No    |                                          | AML                 | 7.5                | 19        |
| 14                                  | Yes, 200                | No                          | cy + flu             | Yes   | Skin                                     | MDS*                | 5.4                | 10        |
| 15                                  | No                      | No                          | cy                   | No    |                                          | MDS*                | 4.0                | 10        |
| 16                                  | No                      | No                          | cy                   | No    |                                          | Thyroid*            | 5.8                | 12        |
| <b>Fanconi Anemia (FA)</b>          |                         |                             |                      |       |                                          |                     |                    |           |
| 17                                  | Yes, 450                | No                          | cy + flu             | Yes   | Skin, oral                               | OP, mouth*          | 10.0               | 16        |
| 18                                  | Yes, 450                | No                          | cy + flu             | No    |                                          | OP, NOS*            | 14.8               | 23        |
| 19                                  | Yes, 450                | No                          | cy + flu             | Yes   | Skin                                     | Non-melanoma skin   | 8.6                | 16        |
| 20                                  | Yes, 450                | No                          | cy + flu             | Yes   | Skin, eyes, oral, GI                     | OP, NOS*            | 8.2                | 16        |
| 21                                  | Yes, 300                | No                          | cy + flu             | No    |                                          | OP, mouth           | 1.0                | 20        |
| 22                                  | Yes, 450                | No                          | cy + flu             | Yes   | Skin, eyes, oral                         | OP, hypopharynx*    | 15.8               | 33        |
| 23                                  | Yes, 450                | No                          | cy                   | Yes   | Skin, oral                               | OP, tongue*         | 13.6               | 21        |
| 24                                  | No                      | No                          | cy                   | Yes   | Skin, GI                                 | OP, tongue*         | 14.5               | 24        |
| 25                                  | Yes, 450                | No                          | cy                   | Yes   | GI                                       | Sarcoma*            | 10.1               | 14        |
| 26                                  | Yes, 400                | No                          | cy + flu             | Yes   | Oral, GI                                 | Nose, sinuses*      | 5.3                | 15        |
| 27                                  | No                      | No                          | cy                   | Yes   | Skin, oral, liver                        | OP, NOS             | 13.4               | 25        |
| 28                                  | No                      | No                          | cy + flu             | Yes   | Skin, eyes, oral, lung, liver, GI, GU    | OP, NOS             | 9.0                | 16        |
| 29                                  | No                      | No                          | cy                   | Yes   | Skin, eyes, oral, liver                  | OP, NOS             | 5.1                | 15        |
| 30                                  | No                      | No                          | cy                   | No    |                                          | Genitourinary       | 10.6               | 24        |
| 31                                  | No                      | No                          | cy                   | No    |                                          | OP, NOS             | 17.6               | 25        |
| 32                                  | No                      | No                          | cy                   | No    |                                          | OP, NOS             | 11.2               | 29        |
| 33                                  | No                      | No                          | cy                   | Yes   | Skin, eyes, oral, GI, liver              | OP, NOS             | 5.0                | 11        |
| 34                                  | No                      | No                          | cy                   | No    |                                          | CNS                 | 12.8               | 19        |
| 35                                  | No                      | No                          | cy                   | No    |                                          | OP, NOS             | 8.2                | 16        |
| 36                                  | No                      | No                          | cy + flu             | No    |                                          | AML*                | 3.9                | 9         |
| 37                                  | Yes, 450                | No                          | cy + flu             | No    |                                          | Non-melanoma skin*  | 7.9                | 13        |
| 38                                  | No                      | No                          | cy                   | No    |                                          | AML                 | 2.2                | 9         |

|    |          |    |          |     |                    |                    |      |    |
|----|----------|----|----------|-----|--------------------|--------------------|------|----|
| 39 | No       | No | cy       | No  |                    | OP, NOS            | 18.5 | 29 |
| 40 | No       | No | cy       | No  |                    | Other, unspecified | 18.1 | 28 |
| 41 | No       | No | cy       | No  |                    | Sarcoma            | 13.3 | 24 |
| 42 | No       | No | cy       | No  |                    | Genitourinary*     | 9.1  | 21 |
| 43 | No       | No | cy       | No  |                    | Genitourinary      | 9.1  | 22 |
| 44 | Yes, 450 | No | cy       | No  |                    | ALL                | 2.7  | 11 |
| 45 | Yes, 450 | No | cy + flu | No  |                    | OP, tongue*        | 8.5  | 19 |
| 46 | Yes, 450 | No | cy + flu | Yes | Skin, oral, GI, Gu | Gastrointestinal*  | 6.1  | 11 |
| 47 | Yes, 450 | No | cy       | No  |                    | MDS*               | 0.7  | 13 |

| Marrow Failure (other) |  |  |  |  |  |  |  |  |
|------------------------|--|--|--|--|--|--|--|--|
|------------------------|--|--|--|--|--|--|--|--|

|    |           |          |            |     |                 |                    |      |    |
|----|-----------|----------|------------|-----|-----------------|--------------------|------|----|
| 48 | Yes, 1000 | No       | cy + vp16  | No  |                 | Other, unspecified | 14.6 | 32 |
| 49 | No        | Yes, 120 | cy + flu   | Yes | Skin, oral      | Non-melanoma skin  | 2.9  | 13 |
| 50 | Yes, 1200 | No       | cy + other | No  | Skin, GI, liver | OP, tongue*        | 10.4 | 22 |
| 51 | No        | Yes, 150 | cy         | No  |                 | Sarcoma*           | 16.5 | 19 |
| 52 | No        | Yes, 192 | cy         | No  |                 | Sarcoma            | 8.0  | 9  |
| 53 | Yes, 200  | No       | cy + flu   | No  |                 | AML*               | 0.8  | 5  |

| Sickle Cell Disease |  |  |  |  |  |  |  |  |
|---------------------|--|--|--|--|--|--|--|--|
|---------------------|--|--|--|--|--|--|--|--|

|    |          |          |          |    |  |                    |      |    |
|----|----------|----------|----------|----|--|--------------------|------|----|
| 54 | Yes, 200 |          | flu      | No |  | MDS*               | 10.0 | 13 |
| 55 | No       | Yes, 362 | cy       | No |  | Other, unspecified | 0.8  | 4  |
| 56 | Yes, 300 | No       | cy + flu | No |  | MDS*               | 4.5  | 6  |

| Primary Immunodeficiency (PID): Severe Combined Immunodeficiency Syndrome (SCID) and Non-SCID |  |  |  |  |  |  |  |  |
|-----------------------------------------------------------------------------------------------|--|--|--|--|--|--|--|--|
|-----------------------------------------------------------------------------------------------|--|--|--|--|--|--|--|--|

|    |           |          |            |    |  |          |     |    |
|----|-----------|----------|------------|----|--|----------|-----|----|
| 57 | No        | No       | flu + mel  | No |  | MDS      | 3.8 | 8  |
| 58 | No        | No       | none       | No |  | Sarcoma* | 7.9 | 8  |
| 59 | Yes, 1332 | No       | cy + Ara-C | No |  | MDS      | 3.7 | 4  |
| 60 | No        | Yes, 384 | cy         | No |  | GI*      | 7.0 | 15 |
| 61 | No        | Yes, 556 | cy         | No |  | AML*     | 0.8 | 12 |

| Leukodystrophy, Osteopetrosis and Metabolic Disorders |  |  |  |  |  |  |  |  |
|-------------------------------------------------------|--|--|--|--|--|--|--|--|
|-------------------------------------------------------|--|--|--|--|--|--|--|--|

|    |          |          |    |     |                        |                   |      |    |
|----|----------|----------|----|-----|------------------------|-------------------|------|----|
| 62 | Yes, 750 | Yes, 368 | cy | Yes | Skin, eyes, liver, MSK | Thyroid*          | 9.1  | 19 |
| 63 | No       | Yes, 832 | cy | No  |                        | Thyroid           | 6.9  | 20 |
| 64 | Yes, 900 | Yes, 112 | cy | No  |                        | Thyroid*          | 13.5 | 14 |
| 65 | No       | Yes, 208 | cy | No  |                        | Melanoma*         | 7.7  | 9  |
| 66 | No       | Yes, 288 | cy | Yes | Skin, GI               | Non-melanoma skin | 7.2  | 13 |

| Histiocytic Disorders |  |  |  |  |  |  |  |  |
|-----------------------|--|--|--|--|--|--|--|--|
|-----------------------|--|--|--|--|--|--|--|--|

|    |    |          |           |    |  |                   |      |    |
|----|----|----------|-----------|----|--|-------------------|------|----|
| 67 | No | Yes, 75  | cy + vp16 | No |  | Non-melanoma skin | 11.3 | 11 |
| 68 | No | Yes, 208 | cy + vp16 | No |  | AML*              | 1.2  | 3  |
| 69 | No | Yes, 186 | cy + vp16 | No |  | AML               | 3.5  | 4  |
| 70 | No | Yes, 280 | cy + vp16 | No |  | CNS               | 9.7  | 13 |
| 71 | No | Yes, 160 | cy + vp16 | No |  | ALL               | 0.9  | 7  |

\*Subsequent neoplasm confirmed by pathology report

Abbreviations: SN: subsequent neoplasm; NMD: non-malignant disease; cGVHD: chronic graft-versus-host disease; TBI: total body irradiation; cGy: centigray; cy: cyclophosphamide; flu: fludarabine; vp-16: etoposide; Ara-C: cytarabine; mel: melphalan; cGVHD: chronic graft-versus-host disease; MSK: musculoskeletal; GI: gastrointestinal; GU: genitourinary; SN: subsequent neoplasm; MDS: myelodysplastic syndrome; AML: acute myeloid leukemia; ALL: acute lymphoblastic leukemia; OP: oropharyngeal; NOS: not-otherwise specified; CNS: central nervous system
